# Supplementary material
Source: publisher figshare collection journal article supplement (https://frontiersin.figshare.com/ndownloader/files/14565881)
Supplement: Supplementary file 1 [file 14565881]

**Table S2.** Results from negative binomial generalised linear models used to test for effects of distance to moorings, distance from shore, location and grain size on the abundance of the three most abundant major taxonomic groups. P-values in bold are significant at α = 0.05.

|  | Crustaceans | | | Molluscs | | Polychaetes | | |
| --- | --- | --- | --- | --- | --- | --- | --- | --- |
| Term | Estimate | P-value | Estimate | | P-value | | Estimate | P-value | |
| Distance from mooring | 0.01 | 0.39 | -0.06 | | **0.02** | | 0.008 | 0.14 | |
| Distance from shore | -0.01 | 0.06 | 0.01 | | 0.24 | | -0.016 | **0.001** | |
| Location | -1.13 | **0.01** | -1.74 | | **0.04** | | 0.16 | 0.27 | |
| Grain size | -0.003 | 0.18 | -0.006 | | **0.049** | | 0.005 | **0.02** | |
| Distance from mooring x Location | -0.04 | 0.30 | 0.03 | | 0.06 | | -0.002 | 0.95 | |
